# Supplementary material for: Evaluation of Dietary Niacin and New-Onset Hypertension Among Chinese Adults
Source: PubMed Central journal article supplement (PMC7788463; doi:10.1001/jamanetworkopen.2020.31669), 2021-01-06
Supplement: jamanetwopen-e2031669-s001.pdf [file jamanetwopen-e2031669-s001.pdf]

## Supplemental Online Content

Zhang Z, Liu M, Zhou C, et al. Evaluation of dietary niacin and new-onset hypertension among Chinese adults. *JAMA Netw Open*. 2021;4(1):e2031669.  
doi:10.1001/jamanetworkopen.2020.31669

**eFigure 1.** Flow Chart of the Participants

**eFigure 2.** Stratified Analyses by Potential Effect Modifiers for the Association Between Dietary Niacin Intake (Quartile 1-2 vs. Quartile 3 vs. Quartile 4) and New-Onset Hypertension

**eTable 1.** Characteristics of the Included and Excluded Participants

**eTable 2.** The Association Between Dietary Niacin Intake and the Risk of New-Onset Hypertension With Further Adjustment for Waist/Hip Ratio, Drinking Status, Sodium, Fruits and Vegetables Intake

**eTable 3.** The Association Between Dietary Niacin Intake and the Risk of New-Onset Hypertension With Exclusion of Participants From the Three Autonomous Cities

**eTable 4.** The Association Between Dietary Niacin Intake and Different Components of New-Onset Hypertension

This supplemental material has been provided by the authors to give readers additional information about their work.

**eFigure 1. Flow chart of the participants**

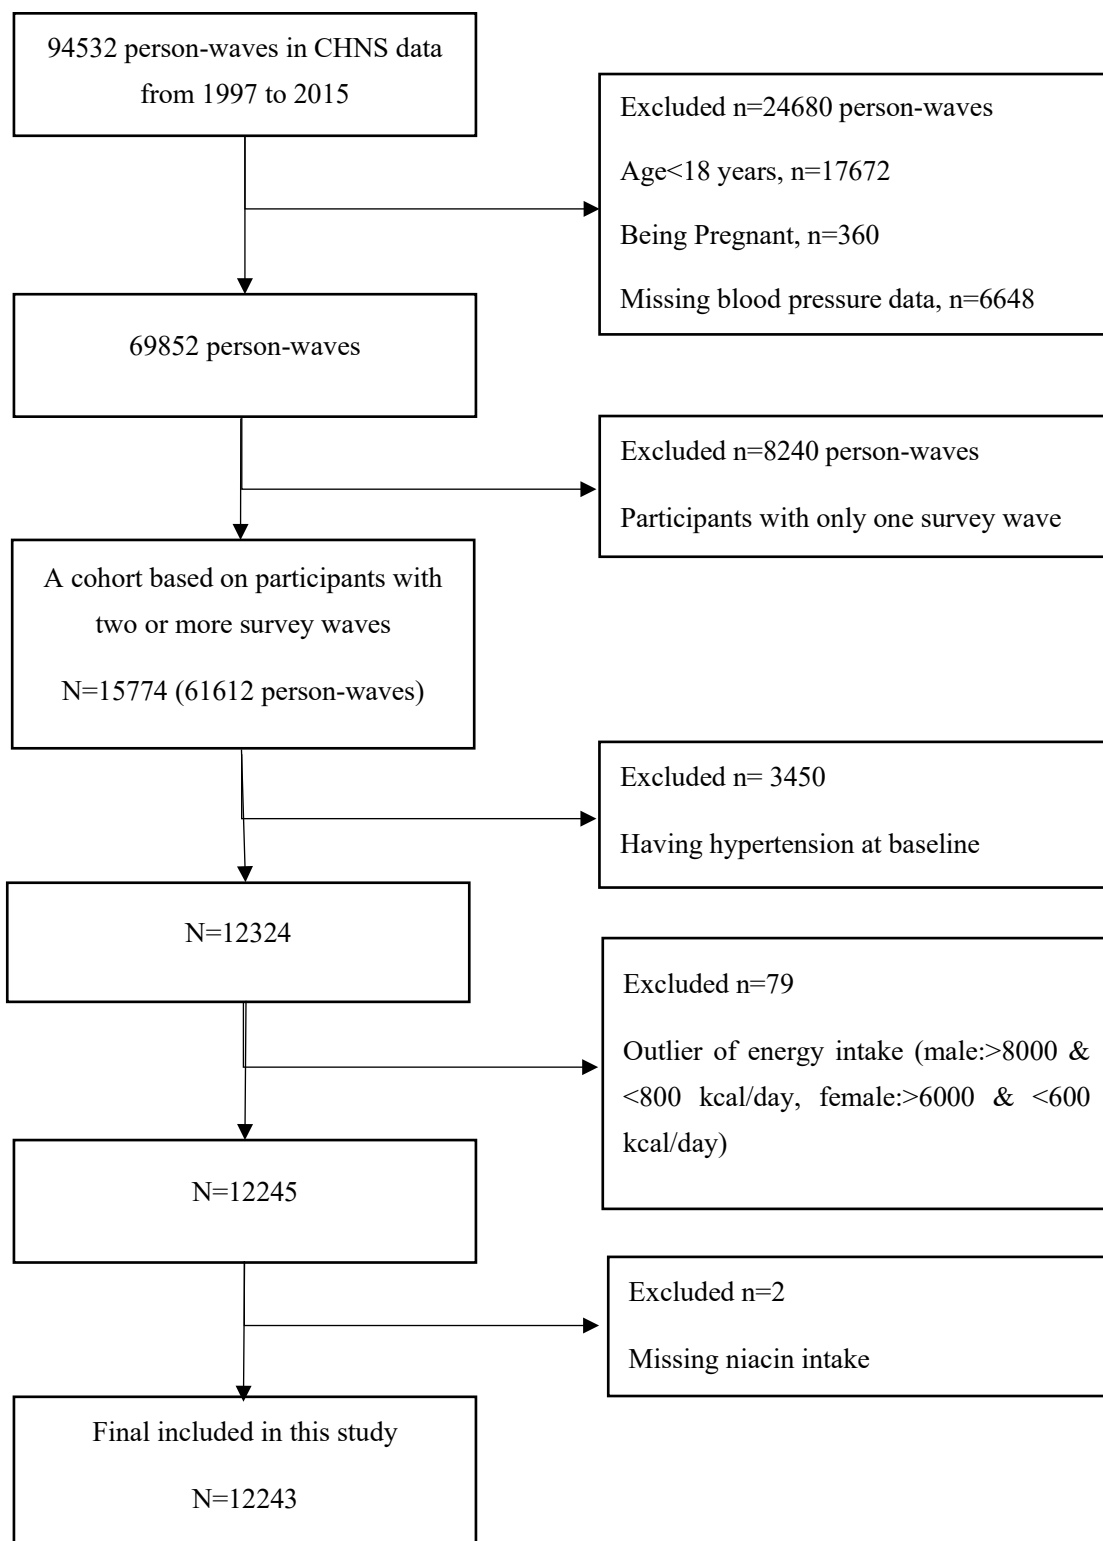

**eFigure 2. Stratified analyses by potential effect modifiers for the association between dietary niacin intake and new-onset hypertension**

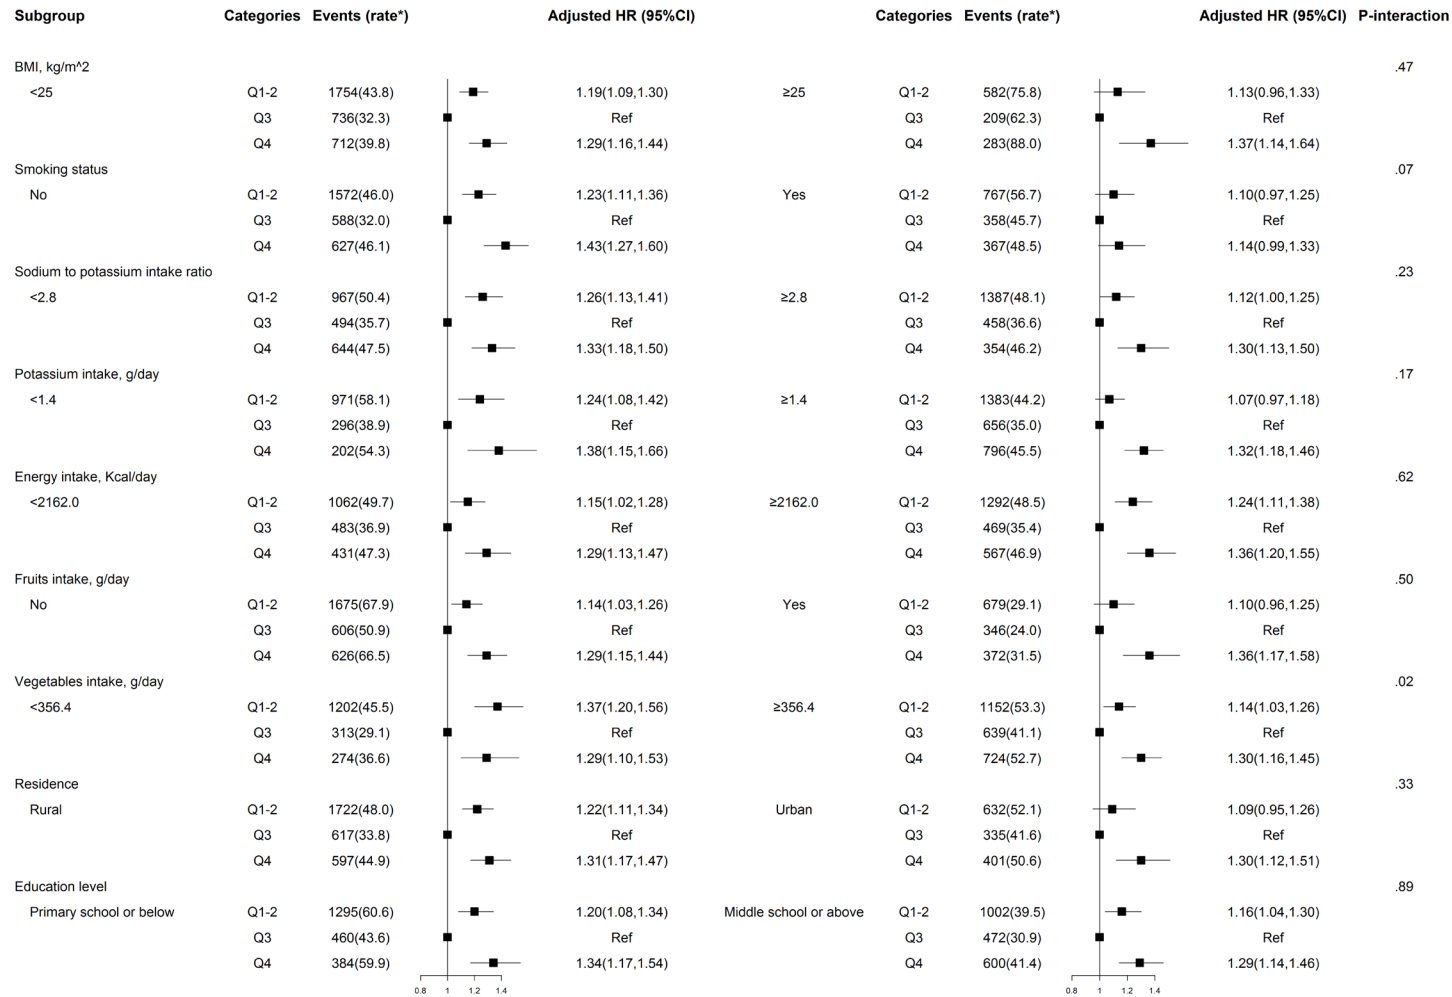

**eTable 1. Characteristics of the included and excluded participants**

| Variables                          | Excluded*    | Included     |
|------------------------------------|--------------|--------------|
| N, person-wave                     | 14888        | 61612        |
| Male, No. (%)                      | 7528 (50.6)  | 29320 (47.6) |
| Age, years                         | 42.0 ± 17.8  | 50.2 ± 15.0  |
| Systolic blood pressure, mmHg      | 121.2 ± 18.1 | 123.7 ± 18.7 |
| Diastolic blood pressure, mmHg     | 78.0 ± 10.9  | 79.4 ± 11.1  |
| Body mass index, kg/m <sup>2</sup> | 23.2 ± 3.9   | 23.3 ± 3.4   |
| Smoking status, No. (%)            | 4028 (29.2)  | 19191 (31.2) |
| Drinking status, No. (%)           | 4407 (32.2)  | 20242 (33.1) |
| Urban residence, No. (%)           | 6512 (43.7)  | 20058 (32.6) |
| Region, No. (%)                    |              |              |
| East and central                   | 8194 (55.0)  | 33599 (54.5) |
| Northeast and north                | 2798 (18.8)  | 12807 (20.8) |
| Southwest and south                | 3896 (26.2)  | 15206 (24.7) |
| Occupation, No. (%)                |              |              |
| Farmer                             | 2455 (16.7)  | 17969 (29.5) |
| Worker                             | 2044 (13.9)  | 5758 (9.4)   |
| Unemployed                         | 5659 (38.5)  | 23639 (38.8) |
| Other                              | 4552 (30.9)  | 13600 (22.3) |
| Education, No. (%)                 |              |              |
| Illiteracy                         | 1435 (10.2)  | 12851 (21.6) |
| Primary school                     | 1991 (14.1)  | 12448 (20.9) |
| Middle school                      | 4991 (35.4)  | 18859 (31.7) |
| High school or above               | 5672 (40.3)  | 15329 (25.8) |
| Self-report diabetes, No. (%)      | 385 (2.6)    | 1638 (2.7)   |

Variables are presented as Mean ± SD or person-wave (%).

© 2021 Zhang Z et al. *JAMA Network Open*.

\*Excluded from the analysis due to missing blood pressure data (6648 person-waves) and those with only one survey wave (8240 person-waves)

**Table 2. The association between dietary niacin intake and the risk of new-onset hypertension with further adjustment for waist/hip ratio, drinking status, sodium, fruits and vegetables intake**

| Niacin intake, mg/day | N    | Events (rate*) | Crude model     |         | Adjusted model† |         |
|-----------------------|------|----------------|-----------------|---------|-----------------|---------|
|                       |      |                | HR (95% CI)     | P value | HR (95% CI)     | P value |
| Quartiles             |      |                |                 |         |                 |         |
| Q1 (<12.4)            | 3061 | 1188(51.7)     | Ref             |         | Ref             |         |
| Q2 (12.4-<14.3)       | 3060 | 1166(46.6)     | 0.90(0.83,0.97) | .009    | 0.92(0.84,1.01) | .07     |
| Q3 (14.3-<16.7)       | 3061 | 952(36.2)      | 0.70(0.64,0.76) | <.001   | 0.81(0.74,0.89) | <.001   |
| Q4 (≥16.7)            | 3061 | 998(47.0)      | 0.92(0.85,1.00) | .05     | 1.05(0.95,1.16) | .37     |
| Categories            |      |                |                 |         |                 |         |
| Q1-2 (<14.3)          | 6121 | 2354(49.0)     | 1.36(1.26,1.47) | <.001   | 1.17(1.08,1.27) | <.001   |
| Q3 (14.3-<16.7)       | 3061 | 952(36.2)      | Ref             |         | Ref             |         |
| Q4 (≥16.7)            | 3061 | 998(47.0)      | 1.32(1.21,1.44) | <.001   | 1.29(1.17,1.42) | <.001   |

\*Incident rate is presented per 1000 person-years of follow-up.

†Adjusted for age, sex, body mass index, waist/hip ratio, smoking status, drinking status, systolic blood pressure, diastolic blood pressure, region, education, occupation, as well as energy, sodium, fruits and vegetables intake and sodium to potassium intake ratio.

**eTable 3. The association between dietary niacin intake and the risk of new-onset hypertension with exclusion of participants from the three autonomous cities**

| Niacin intake, mg/day | N    | Events (rate*) | Crude model     |         | Adjusted model† |         |
|-----------------------|------|----------------|-----------------|---------|-----------------|---------|
|                       |      |                | HR (95% CI)     | P value | HR (95% CI)     | P value |
| Quartiles             |      |                |                 |         |                 |         |
| Q1 (<12.3)            | 2725 | 1100(51.6)     | Ref             |         | Ref             |         |
| Q2 (12.3-<14.2)       | 2724 | 1067(45.9)     | 0.88(0.81,0.96) | .004    | 0.94(0.86,1.02) | .150    |
| Q3 (14.2-<16.4)       | 2725 | 910(36.3)      | 0.70(0.64,0.76) | <.001   | 0.84(0.77,0.93) | <.001   |
| Q4 (≥16.4)            | 2725 | 945(44.8)      | 0.87(0.80,0.95) | .002    | 1.07(0.97,1.18) | .16     |
| Categories            |      |                |                 |         |                 |         |
| Q1-2 (<14.2)          | 5449 | 2167(48.6)     | 1.34(1.24,1.45) | <.001   | 1.14(1.05,1.24) | .001    |
| Q3 (14.2-<16.4)       | 2725 | 910(36.3)      | Ref             |         | Ref             |         |
| Q4 (≥16.4)            | 2725 | 945(44.8)      | 1.25(1.14,1.37) | <.001   | 1.27(1.16,1.39) | <.001   |

\*Incident rate is presented per 1000 person-years of follow-up.

†Adjusted for age, sex, body mass index, smoking status, systolic blood pressure, diastolic blood pressure, region, education, occupation, as well as energy intake and sodium to potassium intake ratio.

**eTable 4. The association between dietary niacin intake and different components of new-onset hypertension**

| Niacin intake, mg/day                    | N    | Events (rate*) | Crude model     |         | Adjusted model† |         |
|------------------------------------------|------|----------------|-----------------|---------|-----------------|---------|
|                                          |      |                | HR (95% CI)     | P value | HR (95% CI)     | P value |
| <b>Physician-diagnosed hypertension</b>  |      |                |                 |         |                 |         |
| Categories                               |      |                |                 |         |                 |         |
| Q1-2 (<14.3)                             | 6084 | 427(8.9)       | 1.19(1.01,1.42) | .04     | 1.02(0.85,1.21) | .86     |
| Q3 (14.3-<16.7)                          | 3041 | 195(7.4)       | Ref             |         | Ref             |         |
| Q4 (≥16.7)                               | 3037 | 212(10.0)      | 1.34(1.11,1.63) | .003    | 1.33(1.09,1.63) | .005    |
| <b>Use of antihypertensive treatment</b> |      |                |                 |         |                 |         |
| Categories                               |      |                |                 |         |                 |         |
| Q1-2 (<14.3)                             | 6088 | 271(5.6)       | 1.24(1.00,1.54) | .05     | 1.08(0.86,1.36) | .49     |
| Q3 (14.3-<16.7)                          | 3042 | 119(4.5)       | Ref             |         | Ref             |         |
| Q4 (≥16.7)                               | 3038 | 143(6.7)       | 1.47(1.15,1.88) | .002    | 1.46(1.13,1.88) | .004    |
| <b>SBP ≥140 and/or DBP ≥90 mmHg</b>      |      |                |                 |         |                 |         |
| Categories                               |      |                |                 |         |                 |         |
| Q1-2 (<14.3)                             | 6121 | 2175(45.3)     | 1.38(1.27,1.49) | <.001   | 1.20(1.11,1.30) | <.001   |
| Q3 (14.3-<16.7)                          | 3061 | 868(33.0)      | Ref             |         | Ref             |         |
| Q4 (≥16.7)                               | 3061 | 912(43.0)      | 1.33(1.21,1.46) | <.001   | 1.32(1.20,1.45) | <.001   |

\*Incident rate is presented per 1000 person-years of follow-up.

†Adjusted for age, sex, body mass index, smoking status, systolic blood pressure, diastolic blood pressure, region, education, occupation, as well as energy intake and sodium to potassium intake ratio.
